# Supplementary material
Source: publisher figshare collection journal article supplement (https://brill.figshare.com/articles/dataset/_/23791842)
Supplement: Supplementary file 1 [file 1]

## Sheet: Males+Females
Locality	RPCS_copy_number (*103)	Sex	Specimen
Estancia La Tacuarita	1297.55	Male	205
Loreto	505.137	Male	156
San Alonso	1146.35	Male	186
San Alonso	1239.51	Male	188
Paraje Angostura	1317	Male	161
Santa Rosa	695.517	Male	125
Saladas Sur	714.008	Male	131
San Roque	825.682	Male	137
Pago Alegre	454.832	Male	43
Pago Alegre	644.063	Male	41
Estancia San Luis	722.156	Male	54
Estancia San Luis	778.487	Male	23
Rincón de Ambrosio	909.917	Male	175
Chavarría	353.596	Male	153
Chavarría	787.205	Male	150
Chavarría	918.688	Male	149
Colonia 3 de abril	682.494	Male	66
Goya	2031.91	Male	181
Goya	2699.81	Male	182
Estancia La Tacuarita	136.229	Female	204
Estancia La Tacuarita	152.129	Female	203
Contreras Cué	167	Female	199
Loreto	118.224	Female	76
San Alonso	213.965	Female	190
San Alonso	399.44	Female	187
Mbarigüí	324	Female	174
Santa Rosa	681.693	Female	122
Santa Rosa	1327.29	Female	180
Saladas	369.567	Female	129
Saladas	429.768	Female	128
Saladas Sur	367.277	Female	132
Saladas Sur	397.568	Female	134
Saladas Sur	458.201	Female	133
San Roque	405.462	Female	135
San Roque	700.412	Female	136
Pago Alegre	266.558	Female	38
Pago Alegre	363.783	Female	44
Estancia San Luis	221.962	Female	53
Estancia San Luis	299.876	Female	18
Rincón de Ambrosio	381.324	Female	176
Chavarría	359.229	Female	151
Chavarría	688.439	Female	152
Colonia 3 de abril	360.141	Female	65
Goya	1532.05	Female	184
Goya	1669.27	Female	183

## Sheet: Males vs Females
Locality	Males		Females		Males-Females (x103)	(Males-Females) /Females	Karyotypically confirmed Y-CH blocks
	RPCS copy number (x103)	SD (x103)	RPCS copy number (x103)	SD (x103)
San Alonso	1192.93	65.8702	306.703	131.151	886.229	2.88954	NA
Loreto	505.137	-	118.224	-	386.912	3.2727	1 block long arm
Contreras_Cue	-	-	167	-	NA	NA	1 block long arm
Estancia La Tacuarita	1297.55	-	144.179	11.243	1153.37	7.99954	NA
Saladas Km Sur	714.008	-	407.682	46.2984	306.326	0.751385	NA
Saladas	-	-	399.667	42.5688	NA	NA	NA
Santa Rosa	695.517	-	1004.49	456.508	-308.976	-0.307594	1 large block
San Roque	825.682	-	552.937	208.562	272.745	0.493266	NA
Estancia San Luis	750.322	39.8318	260.919	55.093	489.402	1.87569	2 blocks long arm
Pago Alegre	549.448	133.807	315.171	68.7479	234.277	0.743335	NA
Mbarigui	-	-	324	-	NA	NA	NA
Paraje Angostura	1317	-	-	-	NA	NA	NA
Goya	2365.86	472.276	1600.66	97.0303	765.201	0.478055	NA
Chavarría	686.496	295.701	523.834	232.787	162.662	0.310523	3 blocks
Colonia 3 de abril	682.494	-	360.141	-	322.353	0.895073	NA
Rincón de Ambrosio	909.917	-	381.324	-	528.593	1.3862	NA
					Mean	1.91776
