# Supplementary material
Source: publisher figshare collection journal article supplement (https://brill.figshare.com/articles/dataset/_/23791842)
Supplement: Supplementary file 1 [file 1]

# **Reassessing the causal connection between satDNA dynamics and chromosomal evolution in *Ctenomys* (Rodentia, Ctenomyidae): Unveiling the overlooked importance of the Y chromosome**

*Diego A. Caraballo* | ORCID: 0000-0002-0345-7861

CONICET–Universidad de Buenos Aires, Instituto de Ecología, Genética y Evolución de Buenos Aires (IEGEBA), Ciudad Universitaria-Pabellón II, Ciudad Autónoma de Buenos Aires C1428EHA, Argentina

Facultad de Ciencias Exactas y Naturales, Universidad de Buenos Aires, Buenos Aires, Argentina

*dcaraballo@ege.fcen.uba.ar*

## **Supplementary material**

TABLE S1    Individual and grouped RPCS copy number, indicating locality, sex, and specimen number. Comparisons between males and females (mean, SD, subtraction and relative amount).

FILE S1    Alignment of three partial mtDNA loci: COI (1-693), cytb (694-1772), CR (1773-2178). Separate sequences for each locus are available in Genbank (Accession numbers JX275502-JX275655 and KT818638-KT818684).
